# Supplementary material for: Development of a Multi-Enzymatic Approach for the Modification of Biopolymers with Ferulic Acid
Source: MDPI journal article supplement (doi:10.3390/biom12070992), 2022-07-17
Supplement: s1 [file s1]

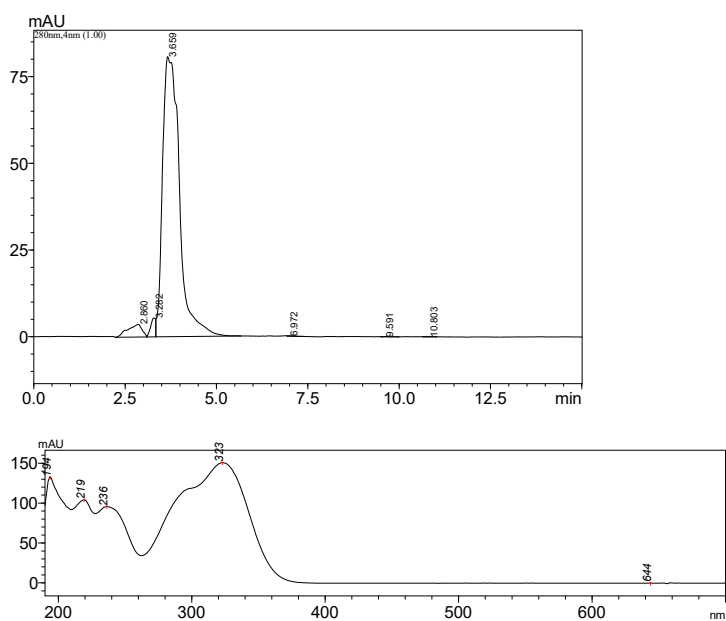

**Figure S1.** HPLC chromatograph (above) and the UV spectrum (below) of the ferulic acid (Retention time 3.6 min) produced through the synergistic action of xylanase and esterase at a mass ratio 1:5 and arabinoxylan concentration 20 mg/mL.

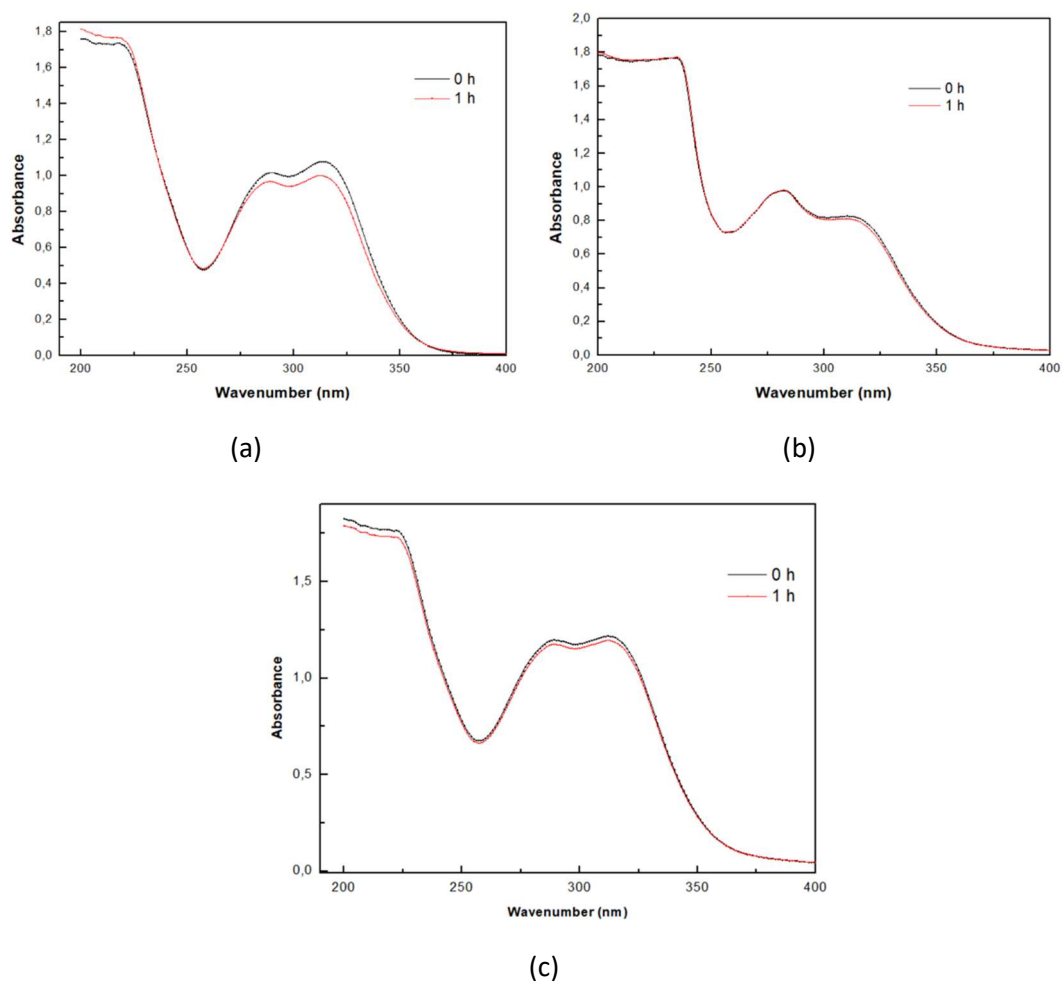

**Figure S2.** Spectrophotometric monitoring of the control samples (a) CMC and ferulic acid solution (b) CS-GEL and ferulic acid solution and (c) chitosan and ferulic acid solution, in the absence of laccase after 1h of incubation at 30 °C.

**Table S1.** Amount of total phenolics (mM) bound onto the enzymatically modified CS, CS-GEL and CMC membranes as estimated by the Folin-Ciocalteu reagent (the standard deviation was less than 5% in all cases).

| Sample | Phenolics (mM) |
|--------|----------------|
| CS     | 3.50           |
| CS-GEL | 4.75           |
| CMC    | 2.75           |
